# Supplementary material for: Gold nanoparticle superstructures with enhanced photothermal effect
Source: Royal Society of Chemistry journal article supplement (doi:10.1039/c3ce26975b), 2013-01-01
Supplement: c3ce26975b.pdf [file c3ce26975b.pdf]

## Supporting Information:

### Gold nanoparticle superstructures with enhanced photothermal effect

Chenhui Yang,<sup>a,b</sup> Hongyan Sui,<sup>c</sup> Xiangwei Li,<sup>c</sup> Jishu Han,<sup>a</sup> Xintao Luo,<sup>a</sup> Hao Zhang,<sup>\*a</sup>

Haizhu Sun,<sup>\*b</sup> Hongchen Sun,<sup>c</sup> Yanmin Zhou<sup>c</sup> and Bai Yang<sup>a</sup>

<sup>a</sup> State Key Lab of Supramolecular Structure and Materials, College of Chemistry, Jilin University, Changchun 130012, People's Republic of China

E-mail: hao\_zhang@jlu.edu.cn

<sup>b</sup> College of Chemistry, Northeast Normal University, Changchun 130024, P. R. China

E-mail: sunhz335@nenu.edu.cn

<sup>c</sup> School of Stomatology, Jilin University, Changchun 130041, P. R. China.

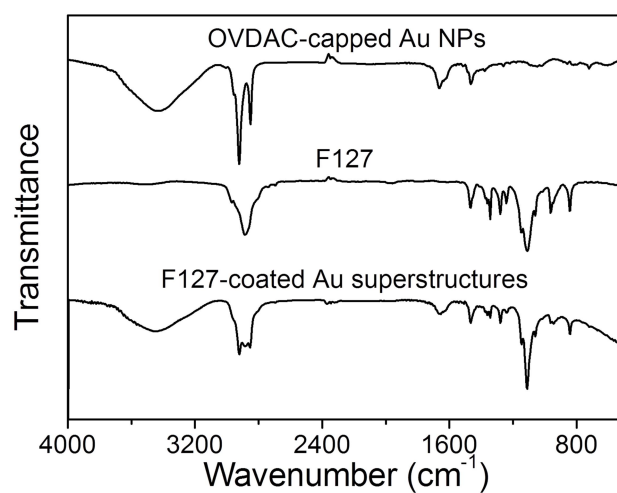

**Figure S1.** FTIR spectra of OVDAC-capped Au NPs, pure F127, and F127-coated Au superstructures.

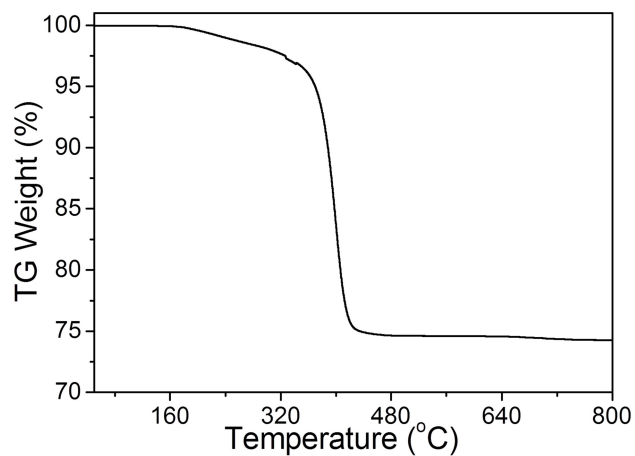

**Figure S2.** TGA curve of F127-coated Au superstructures. The superstructures are constructed with the F127 concentration of 0.001mg/mL.

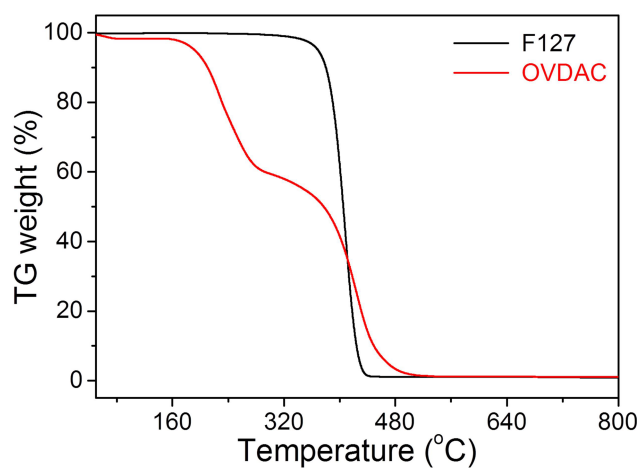

**Figure S3.** TGA curves of pure OVDAC and F127.

**Table S1.** Comparison of the zeta potentials of Au superstructures which are constructed with and without removing the excessive OVDAC in OVDAC-capped Au NP chloroform solution. Four F127 concentrations of 0.1, 0.01, 0.001, and 0.0001 mg/mL are studied.

| F127 concentration (mg/mL) | $1 \times 10^{-1}$ | $1 \times 10^{-2}$ | $1 \times 10^{-3}$ | $1 \times 10^{-4}$ |
|----------------------------|--------------------|--------------------|--------------------|--------------------|
| with OVDAC (mV)            | 35.36              | 27.92              | 30.96              | 37.78              |
| without OVDAC (mV)         | -16.31             | -9.50              | -7.90              | -5.38              |

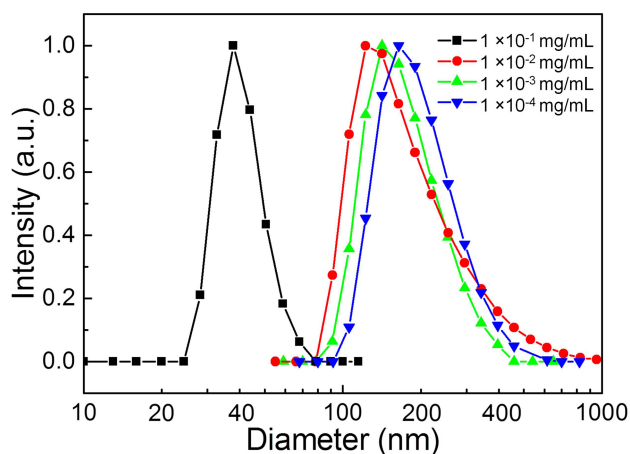

**Figure S4.** DLS size distribution of F127-coated Au NP superstructures which are constructed with the F127 concentration of 0.1 (a), 0.01 (b), 0.001 (c), and 0.0001 (d) mg/mL. Before construction, the OVDAC-capped Au NPs are purified to remove excessive OVDAC. The corresponding TEM images are shown in Figure 5.

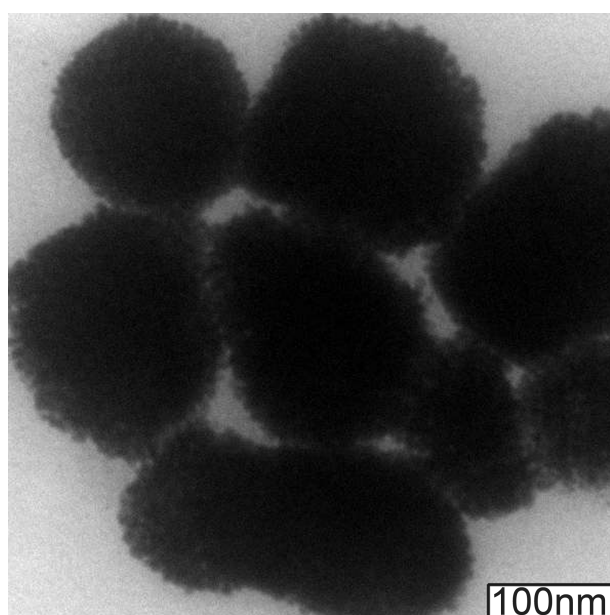

**Figure S5.** TEM image of F127-coated Au superstructures from DT-capped Au NPs which are constructed with the assistance of 0.12 mg/mL OVDAC. The F127 concentration is 0.001mg/mL.

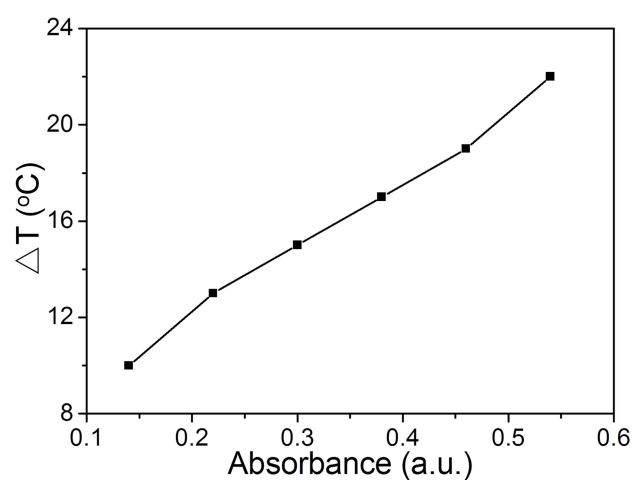

**Figure S6.** Concentration effect on the temperature increment of F127-coated Au superstructures. The superstructures are constructed with the F127 concentration of 0.001mg/mL. The samples are irradiated with a 650 nm laser for 8 min. The output power is 1 W/cm<sup>2</sup>. The initial temperature is 20 °C. Before laser irradiation, the absorbance of the plasmon peaks of Au superstructures is adjusted to 0.14, 0.22, 0.30, 0.38, 0.46 and 0.54, respectively, by diluting the suspensions.
